# Supplementary material for: An expectation conditional maximization algorithm for the skew-normal based stochastic frontier model
Source: Springer Nature journal article supplement (doi:10.1007/s00180-023-01356-2), 2023-05-02
Supplement: 180_2023_1356_MOESM1_ESM.pdf [file 180_2023_1356_MOESM1_ESM.pdf]

# Online Supplement: An expectation conditional maximization algorithm for the skew-normal based stochastic frontier model

Xiaonan Zhu<sup>1</sup>, Zheng Wei<sup>2\*</sup>, Tonghui Wang<sup>3</sup>, S.T. Boris Choy<sup>4</sup> and Ziwei Ma<sup>5</sup>

<sup>1</sup>Department of Mathematics, University of North Alabama, Florence, Alabama, USA .

<sup>2</sup>Department of Mathematics and Statistics, Texas A&M University - Corpus Christi, Corpus Christi, Texas, USA.

<sup>3</sup>Department of Mathematical Sciences, New Mexico State University, Las Cruces, New Mexico, USA.

<sup>4</sup>Discipline of Business Analytics, The University of Sydney, Sydney, New South Wales, Australia.

<sup>5</sup>Department of Mathematics, University of Tennessee at Chattanooga, Chattanooga, Tennessee, USA.

\*Corresponding author(s). E-mail(s): [zheng.wei@tamucc.edu](mailto:zheng.wei@tamucc.edu);

## Supplementary Material

This supplementary material includes the detailed information about the simulation study in Section 4 of main text.

The following six simulation scenarios with moderate skewness  $\lambda = -5, -2$ , and relative large skewness  $\lambda = -10$  with small and moderate sample sizes  $n = 50, 100$ , and  $200$ , are considered:

**Scenario 1. ECM v.s. NM:**  $\beta = 0.5$ ,  $V \sim SN(0, \sigma_v^2, \lambda)$  with  $\sigma_v = 1$ ,  $\lambda = -5$ , and  $U \sim HN(0, \sigma_u^2)$  with  $\sigma_u = 0.5$  and  $s = -1$  for cost function.

**Scenario 2. ECM v.s. NM:**  $\beta = 1$ ,  $V \sim SN(0, \sigma_v^2, \lambda)$  with  $\sigma_v = 1$ ,  $\lambda = -5$ , and  $U \sim HN(0, \sigma_u^2)$  with  $\sigma_u = 0.5$  and  $s = 1$  for production function.

**Scenario 3. ECM v.s. NM:**  $\beta = 0.5$ ,  $V \sim SN(0, \sigma_v^2, \lambda)$  with  $\sigma_v = 1$ ,

2 *Online Supplement*

$\lambda = -2$ , and  $U \sim HN(0, \sigma_u^2)$  with  $\sigma_u = 0.5$  and  $s = -1$ .

**Scenario 4. ECM v.s. NM:**  $\beta = 1$ ,  $V \sim SN(0, \sigma_v^2, \lambda)$  with  $\sigma_v = 1$ ,  $\lambda = -2$ , and  $U \sim HN(0, \sigma_u^2)$  with  $\sigma_u = 0.5$  and  $s = 1$ .

**Scenario 5. ECM v.s. NM:**  $\beta = 0.5$ ,  $V \sim SN(0, \sigma_v^2, \lambda)$  with  $\sigma_v = 1$ ,  $\lambda = -10$ , and  $U \sim HN(0, \sigma_u^2)$  with  $\sigma_u = 0.5$  and  $s = -1$ .

**Scenario 6. ECM v.s. NM:**  $\beta = 1$ ,  $V \sim SN(0, \sigma_v^2, \lambda)$  with  $\sigma_v = 1$ ,  $\lambda = -10$ , and  $U \sim HN(0, \sigma_u^2)$  with  $\sigma_u = 0.5$  and  $s = 1$ .

**Table 1** The sample mean and RMSE of the MLE for parameters SN-SFM based on ECM-algorithms and NM algorithm given for sample sizes  $n = 50, 100$  and  $200$ , under simulation Scenario 1 for 1000 simulated data sets.

| $n=50$            | NM        |           |           |           |           |           |           |        | ECM       |        |           |        |       |  |
|-------------------|-----------|-----------|-----------|-----------|-----------|-----------|-----------|--------|-----------|--------|-----------|--------|-------|--|
|                   | Initial 1 |           | Initial 2 |           | Initial 3 |           | Initial 1 |        | Initial 2 |        | Initial 3 |        |       |  |
|                   | True      | Mean      | RMSE      | Mean      | RMSE      | Mean      | RMSE      | Mean   | RMSE      | Mean   | RMSE      | Mean   | RMSE  |  |
| $\hat{\beta}$     | 0.5       | 0.520     | 0.141     | 0.520     | 0.142     | 0.522     | 0.151     | 0.520  | 0.142     | 0.520  | 0.142     | 0.511  | 0.137 |  |
| $\hat{\sigma}_v$  | 1.0       | 0.962     | 0.085     | 0.962     | 0.085     | 0.964     | 0.085     | 0.960  | 0.084     | 0.960  | 0.084     | 0.968  | 0.080 |  |
| $\hat{\sigma}_u$  | 0.5       | 0.417     | 0.167     | 0.417     | 0.168     | 0.420     | 0.169     | 0.413  | 0.163     | 0.412  | 0.163     | 0.439  | 0.149 |  |
| $\hat{\lambda}$   | -5.0      | -1256.804 | 4712.939  | -1108.443 | 4233.623  | -2818.076 | 12027.745 | -5.142 | 4.490     | -5.088 | 4.426     | -6.728 | 5.033 |  |
| $\hat{\lambda}_w$ | -5.0      | -1066.343 | 3263.589  | -853.427  | 2796.913  | -2163.537 | 6768.167  | -5.014 | 3.671     | -4.965 | 3.577     | -6.703 | 4.952 |  |
| $\hat{\lambda}_T$ | -5.0      | -475.388  | 1599.549  | -313.641  | 1151.119  | -907.158  | 3132.608  | -4.714 | 3.097     | -4.676 | 3.023     | -6.473 | 4.422 |  |

  

| $n=100$           | NM        |           |           |           |           |           |           |        | ECM       |        |           |        |       |  |
|-------------------|-----------|-----------|-----------|-----------|-----------|-----------|-----------|--------|-----------|--------|-----------|--------|-------|--|
|                   | Initial 1 |           | Initial 2 |           | Initial 3 |           | Initial 1 |        | Initial 2 |        | Initial 3 |        |       |  |
|                   | True      | Mean      | RMSE      | Mean      | RMSE      | Mean      | RMSE      | Mean   | RMSE      | Mean   | RMSE      | Mean   | RMSE  |  |
| $\hat{\beta}$     | 0.5       | 0.484     | 0.194     | 0.482     | 0.197     | 0.476     | 0.196     | 0.483  | 0.192     | 0.484  | 0.192     | 0.473  | 0.186 |  |
| $\hat{\sigma}_v$  | 1.0       | 0.943     | 0.112     | 0.941     | 0.115     | 0.952     | 0.105     | 0.942  | 0.110     | 0.941  | 0.111     | 0.956  | 0.100 |  |
| $\hat{\sigma}_u$  | 0.5       | 0.416     | 0.184     | 0.411     | 0.189     | 0.443     | 0.167     | 0.415  | 0.173     | 0.412  | 0.175     | 0.457  | 0.151 |  |
| $\hat{\lambda}$   | -5.0      | -2299.816 | 9054.092  | -2730.388 | 9102.090  | -9033.763 | 28666.134 | -5.234 | 4.379     | -5.174 | 4.283     | -7.649 | 6.224 |  |
| $\hat{\lambda}_w$ | -5.0      | -1763.478 | 5375.246  | -2470.002 | 7527.073  | -7516.779 | 19808.067 | -5.153 | 4.079     | -5.099 | 4.004     | -7.540 | 5.779 |  |
| $\hat{\lambda}_T$ | -5.0      | -780.719  | 2585.598  | -1093.253 | 3535.225  | -4430.423 | 12527.677 | -4.799 | 3.383     | -4.767 | 3.356     | -7.290 | 5.150 |  |

  

| $n=200$           | NM        |           |           |           |           |            |           |        | ECM       |        |           |        |       |  |
|-------------------|-----------|-----------|-----------|-----------|-----------|------------|-----------|--------|-----------|--------|-----------|--------|-------|--|
|                   | Initial 1 |           | Initial 2 |           | Initial 3 |            | Initial 1 |        | Initial 2 |        | Initial 3 |        |       |  |
|                   | True      | Mean      | RMSE      | Mean      | RMSE      | Mean       | RMSE      | Mean   | RMSE      | Mean   | RMSE      | Mean   | RMSE  |  |
| $\hat{\beta}$     | 0.5       | 0.455     | 0.270     | 0.445     | 0.279     | 0.446      | 0.270     | 0.453  | 0.267     | 0.454  | 0.268     | 0.443  | 0.261 |  |
| $\hat{\sigma}_v$  | 1.0       | 0.915     | 0.151     | 0.907     | 0.162     | 0.925      | 0.147     | 0.915  | 0.149     | 0.913  | 0.150     | 0.929  | 0.140 |  |
| $\hat{\sigma}_u$  | 0.5       | 0.403     | 0.212     | 0.387     | 0.226     | 0.437      | 0.197     | 0.409  | 0.192     | 0.403  | 0.196     | 0.451  | 0.175 |  |
| $\hat{\lambda}$   | -5.0      | -6147.461 | 18154.508 | -6532.214 | 21056.548 | -19346.642 | 47032.341 | -5.715 | 5.769     | -5.679 | 5.810     | -8.112 | 7.294 |  |
| $\hat{\lambda}_w$ | -5.0      | -5410.104 | 14195.274 | -5695.146 | 16304.836 | -18453.644 | 43239.918 | -5.534 | 4.998     | -5.500 | 5.065     | -7.933 | 6.672 |  |
| $\hat{\lambda}_T$ | -5.0      | -3136.300 | 8530.876  | -2790.288 | 7967.408  | -12212.398 | 28855.814 | -5.119 | 4.229     | -5.069 | 4.272     | -7.635 | 5.957 |  |

**Table 2** The sample mean and RMSE of the MLE for parameters SN-SFM based on ECM-algorithms and NM algorithm given for sample sizes  $n = 50, 100$  and  $200$ , under Scenario 2 for 1000 simulated data sets.

|                   |      | NM        |          |           |          |           |          | ECM       |       |           |       |           |        |      |
|-------------------|------|-----------|----------|-----------|----------|-----------|----------|-----------|-------|-----------|-------|-----------|--------|------|
|                   |      | Initial 1 |          | Initial 2 |          | Initial 3 |          | Initial 1 |       | Initial 2 |       | Initial 3 |        |      |
|                   |      | True      | Mean     | RMSE      | Mean     | RMSE      | Mean     | RMSE      | Mean  | RMSE      | Mean  | RMSE      | Mean   | RMSE |
| $n=50$            | True |           |          |           |          |           |          |           |       |           |       |           |        |      |
| $\hat{\beta}$     | 1.0  | 0.926     | 0.254    | 0.913     | 0.263    | 0.918     | 0.257    | 0.901     | 0.260 | 0.899     | 0.261 | 0.922     | 0.254  |      |
| $\hat{\sigma}_v$  | 1.0  | 0.617     | 0.450    | 0.568     | 0.489    | 0.691     | 0.410    | 0.499     | 0.535 | 0.505     | 0.530 | 0.870     | 0.249  |      |
| $\hat{\sigma}_u$  | 0.5  | 0.849     | 0.439    | 0.900     | 0.455    | 0.768     | 0.400    | 0.960     | 0.498 | 0.955     | 0.493 | 0.586     | 0.268  |      |
| $\hat{\lambda}$   | -5.0 | -781.804  | 1407.608 | -767.642  | 1439.057 | -883.959  | 1643.532 | -6.071    | 5.825 | -5.816    | 5.448 | -9.653    | 9.952  |      |
| $\hat{\lambda}_w$ | -5.0 | -751.868  | 1304.391 | -740.578  | 1342.937 | -854.714  | 1536.978 | -5.979    | 5.463 | -5.762    | 5.247 | -9.505    | 9.337  |      |
| $\hat{\lambda}_T$ | -5.0 | -640.016  | 1097.549 | -617.339  | 1115.798 | -708.910  | 1257.050 | -5.601    | 4.667 | -5.396    | 4.494 | -8.598    | 7.021  |      |
| $n=100$           | True |           |          |           |          |           |          |           |       |           |       |           |        |      |
| $\hat{\beta}$     | 1.0  | 0.956     | 0.180    | 0.955     | 0.180    | 0.954     | 0.180    | 0.942     | 0.178 | 0.942     | 0.178 | 0.956     | 0.176  |      |
| $\hat{\sigma}_v$  | 1.0  | 0.605     | 0.460    | 0.556     | 0.488    | 0.712     | 0.398    | 0.503     | 0.529 | 0.505     | 0.525 | 0.896     | 0.240  |      |
| $\hat{\sigma}_u$  | 0.5  | 0.882     | 0.454    | 0.934     | 0.473    | 0.768     | 0.397    | 0.980     | 0.506 | 0.977     | 0.503 | 0.579     | 0.264  |      |
| $\hat{\lambda}$   | -5.0 | -548.573  | 1189.182 | -544.971  | 1181.034 | -584.392  | 1327.995 | -4.912    | 4.788 | -4.764    | 4.746 | -8.542    | 10.251 |      |
| $\hat{\lambda}_w$ | -5.0 | -527.741  | 1107.578 | -529.323  | 1125.141 | -551.467  | 1192.616 | -4.808    | 4.397 | -4.645    | 4.168 | -8.115    | 7.270  |      |
| $\hat{\lambda}_T$ | -5.0 | -398.682  | 853.134  | -397.235  | 866.301  | -402.491  | 884.657  | -4.405    | 3.653 | -4.273    | 3.500 | -7.407    | 5.462  |      |
| $n=200$           | True |           |          |           |          |           |          |           |       |           |       |           |        |      |
| $\hat{\beta}$     | 1.0  | 0.993     | 0.127    | 0.992     | 0.127    | 0.992     | 0.127    | 0.984     | 0.123 | 0.984     | 0.123 | 0.991     | 0.124  |      |
| $\hat{\sigma}_v$  | 1.0  | 0.592     | 0.451    | 0.569     | 0.465    | 0.714     | 0.379    | 0.530     | 0.494 | 0.532     | 0.491 | 0.890     | 0.237  |      |
| $\hat{\sigma}_u$  | 0.5  | 0.917     | 0.459    | 0.942     | 0.468    | 0.790     | 0.392    | 0.976     | 0.493 | 0.975     | 0.491 | 0.607     | 0.261  |      |
| $\hat{\lambda}$   | -5.0 | -251.163  | 825.093  | -236.497  | 772.072  | -280.149  | 936.637  | -3.966    | 3.685 | -3.880    | 3.425 | -6.704    | 5.775  |      |
| $\hat{\lambda}_w$ | -5.0 | -223.175  | 681.274  | -213.727  | 657.830  | -245.003  | 752.653  | -3.856    | 3.210 | -3.800    | 3.155 | -6.498    | 4.739  |      |
| $\hat{\lambda}_T$ | -5.0 | -103.788  | 366.422  | -97.737   | 353.608  | -111.180  | 400.114  | -3.524    | 2.676 | -3.483    | 2.641 | -6.010    | 3.451  |      |

**Table 3** The sample mean and RMSE of the MLE for parameters SN-SFM based on ECM-algorithms and NM algorithm given for sample sizes  $n = 50, 100$  and  $200$ , under Scenario 3 for 1000 simulated data sets.

|                   |      | NM        |           |           |           |            |           | ECM       |       |           |       |           |       |
|-------------------|------|-----------|-----------|-----------|-----------|------------|-----------|-----------|-------|-----------|-------|-----------|-------|
|                   |      | Initial 1 |           | Initial 2 |           | Initial 3  |           | Initial 1 |       | Initial 2 |       | Initial 3 |       |
|                   |      | True      | Mean      | RMSE      | Mean      | RMSE       | Mean      | RMSE      | Mean  | RMSE      | Mean  | RMSE      | Mean  |
| $n=50$            | True |           |           |           |           |            |           |           |       |           |       |           |       |
| $\hat{\beta}$     | 0.5  | 0.461     | 0.317     | 0.449     | 0.328     | 0.449      | 0.315     | 0.458     | 0.315 | 0.456     | 0.320 | 0.451     | 0.300 |
| $\hat{\sigma}_v$  | 1.0  | 0.958     | 0.152     | 0.951     | 0.159     | 0.974      | 0.149     | 0.960     | 0.148 | 0.956     | 0.152 | 0.981     | 0.140 |
| $\hat{\sigma}_u$  | 0.5  | 0.447     | 0.248     | 0.421     | 0.259     | 0.506      | 0.243     | 0.465     | 0.213 | 0.450     | 0.215 | 0.531     | 0.215 |
| $\hat{\lambda}$   | -2.0 | -6076.404 | 20523.342 | -5356.021 | 17641.647 | -13158.913 | 35833.048 | -4.648    | 6.114 | -4.565    | 6.333 | -7.192    | 8.365 |
| $\hat{\lambda}_w$ | -2.0 | -5440.870 | 17130.449 | -4885.812 | 15188.298 | -12400.385 | 32517.653 | -4.465    | 5.342 | -4.347    | 5.321 | -7.040    | 7.821 |
| $\hat{\lambda}_T$ | -2.0 | -2222.813 | 7488.340  | -2086.233 | 7116.580  | -7230.291  | 19892.576 | -4.004    | 4.398 | -3.878    | 4.349 | -6.695    | 7.097 |
| $n=100$           | True |           |           |           |           |            |           |           |       |           |       |           |       |
| $\hat{\beta}$     | 0.5  | 0.492     | 0.233     | 0.489     | 0.233     | 0.481      | 0.231     | 0.491     | 0.230 | 0.491     | 0.231 | 0.478     | 0.225 |
| $\hat{\sigma}_v$  | 1.0  | 0.981     | 0.111     | 0.977     | 0.115     | 0.995      | 0.109     | 0.983     | 0.106 | 0.981     | 0.108 | 1.001     | 0.103 |
| $\hat{\sigma}_u$  | 0.5  | 0.459     | 0.223     | 0.444     | 0.233     | 0.509      | 0.220     | 0.467     | 0.198 | 0.460     | 0.200 | 0.529     | 0.202 |
| $\hat{\lambda}$   | -2.0 | -2148.864 | 10034.275 | -1501.571 | 6672.304  | -4390.167  | 17703.191 | -3.619    | 4.245 | -3.595    | 4.248 | -5.658    | 6.240 |
| $\hat{\lambda}_w$ | -2.0 | -1425.096 | 5057.101  | -1141.308 | 4230.792  | -3234.480  | 10455.356 | -3.506    | 3.632 | -3.489    | 3.662 | -5.563    | 5.864 |
| $\hat{\lambda}_T$ | -2.0 | -436.996  | 2084.803  | -280.193  | 1377.344  | -1299.585  | 4972.154  | -3.149    | 2.863 | -3.124    | 2.877 | -5.287    | 5.319 |
| $n=200$           | True |           |           |           |           |            |           |           |       |           |       |           |       |
| $\hat{\beta}$     | 0.5  | 0.505     | 0.173     | 0.504     | 0.176     | 0.496      | 0.173     | 0.505     | 0.172 | 0.505     | 0.173 | 0.491     | 0.169 |
| $\hat{\sigma}_v$  | 1.0  | 0.982     | 0.093     | 0.981     | 0.096     | 0.993      | 0.092     | 0.983     | 0.089 | 0.982     | 0.090 | 1.000     | 0.088 |
| $\hat{\sigma}_u$  | 0.5  | 0.455     | 0.206     | 0.449     | 0.210     | 0.491      | 0.206     | 0.458     | 0.188 | 0.455     | 0.189 | 0.515     | 0.195 |
| $\hat{\lambda}$   | -2.0 | -583.078  | 3531.315  | -610.449  | 3169.393  | -1077.198  | 5625.668  | -3.059    | 3.121 | -3.047    | 3.156 | -5.149    | 5.499 |
| $\hat{\lambda}_w$ | -2.0 | -316.455  | 1363.255  | -403.314  | 1738.878  | -683.662   | 2809.003  | -2.994    | 2.814 | -2.973    | 2.791 | -5.107    | 5.365 |
| $\hat{\lambda}_T$ | -2.0 | -26.297   | 173.693   | -32.151   | 218.556   | -99.543    | 588.296   | -2.657    | 1.980 | -2.642    | 1.976 | -4.841    | 4.861 |

4 *Online Supplement***Table 4** The sample mean and RMSE of the MLE for parameters SN-SFM based on ECM-algorithms and NM algorithm given for sample sizes  $n = 50, 100$  and  $200$ , under Scenario 4 for 1000 simulated data sets.

|                   |      | NM        |         |           |          |           |          | ECM       |       |           |       |           |       |      |
|-------------------|------|-----------|---------|-----------|----------|-----------|----------|-----------|-------|-----------|-------|-----------|-------|------|
|                   |      | Initial 1 |         | Initial 2 |          | Initial 3 |          | Initial 1 |       | Initial 2 |       | Initial 3 |       |      |
|                   |      | True      | Mean    | RMSE      | Mean     | RMSE      | Mean     | RMSE      | Mean  | RMSE      | Mean  | RMSE      | Mean  | RMSE |
| $n = 50$          | True |           |         |           |          |           |          |           |       |           |       |           |       |      |
| $\hat{\beta}$     | 1.0  | 1.003     | 0.309   | 0.993     | 0.326    | 0.990     | 0.340    | 0.978     | 0.344 | 0.977     | 0.344 | 0.995     | 0.332 |      |
| $\hat{\sigma}_v$  | 1.0  | 0.826     | 0.295   | 0.687     | 0.386    | 0.816     | 0.305    | 0.630     | 0.418 | 0.630     | 0.418 | 0.945     | 0.191 |      |
| $\hat{\sigma}_u$  | 0.5  | 0.664     | 0.368   | 0.839     | 0.432    | 0.687     | 0.366    | 0.913     | 0.462 | 0.915     | 0.463 | 0.537     | 0.264 |      |
| $\hat{\lambda}$   | -2.0 | -218.235  | 740.675 | -35.587   | 3247.246 | 263.982   | 4757.037 | -2.212    | 4.121 | -2.100    | 3.628 | -3.664    | 4.829 |      |
| $\hat{\lambda}_w$ | -2.0 | -187.905  | 603.922 | -158.900  | 589.366  | -168.102  | 551.023  | -2.249    | 3.230 | -2.233    | 3.182 | -3.730    | 4.587 |      |
| $\hat{\lambda}_T$ | -2.0 | -85.283   | 361.476 | -41.156   | 221.938  | -70.937   | 309.750  | -1.760    | 1.896 | -1.765    | 1.967 | -3.090    | 3.010 |      |
| $n = 100$         | True |           |         |           |          |           |          |           |       |           |       |           |       |      |
| $\hat{\beta}$     | 1.0  | 0.994     | 0.246   | 0.993     | 0.247    | 0.993     | 0.247    | 0.987     | 0.251 | 0.986     | 0.251 | 0.993     | 0.246 |      |
| $\hat{\sigma}_v$  | 1.0  | 0.856     | 0.271   | 0.771     | 0.323    | 0.883     | 0.253    | 0.651     | 0.391 | 0.650     | 0.391 | 0.957     | 0.193 |      |
| $\hat{\sigma}_u$  | 0.5  | 0.645     | 0.346   | 0.750     | 0.395    | 0.622     | 0.321    | 0.905     | 0.448 | 0.906     | 0.448 | 0.533     | 0.256 |      |
| $\hat{\lambda}$   | -2.0 | -54.220   | 574.959 | -40.580   | 314.681  | -44.914   | 346.186  | -1.459    | 1.804 | -1.455    | 1.829 | -2.572    | 2.581 |      |
| $\hat{\lambda}_w$ | -2.0 | -1.993    | 0.966   | -1.729    | 1.011    | -2.131    | 1.230    | -1.322    | 1.129 | -1.313    | 1.125 | -2.382    | 1.282 |      |
| $\hat{\lambda}_T$ | -2.0 | -1.904    | 0.700   | -1.642    | 0.787    | -2.023    | 0.802    | -1.252    | 0.974 | -1.247    | 0.979 | -2.248    | 0.817 |      |
| $n = 200$         | True |           |         |           |          |           |          |           |       |           |       |           |       |      |
| $\hat{\beta}$     | 1.0  | 0.989     | 0.168   | 0.989     | 0.168    | 0.989     | 0.168    | 0.986     | 0.169 | 0.986     | 0.169 | 0.990     | 0.167 |      |
| $\hat{\sigma}_v$  | 1.0  | 0.842     | 0.259   | 0.797     | 0.286    | 0.894     | 0.226    | 0.669     | 0.361 | 0.668     | 0.361 | 0.951     | 0.172 |      |
| $\hat{\sigma}_u$  | 0.5  | 0.670     | 0.321   | 0.724     | 0.353    | 0.612     | 0.279    | 0.885     | 0.417 | 0.886     | 0.417 | 0.544     | 0.220 |      |
| $\hat{\lambda}$   | -2.0 | -1.725    | 0.745   | -1.592    | 0.776    | -1.892    | 0.795    | -1.201    | 0.976 | -1.199    | 0.978 | -2.057    | 0.738 |      |
| $\hat{\lambda}_w$ | -2.0 | -1.712    | 0.700   | -1.582    | 0.738    | -1.879    | 0.725    | -1.191    | 0.945 | -1.190    | 0.947 | -2.044    | 0.663 |      |
| $\hat{\lambda}_T$ | -2.0 | -1.681    | 0.620   | -1.551    | 0.676    | -1.857    | 0.590    | -1.183    | 0.908 | -1.182    | 0.910 | -2.024    | 0.534 |      |

**Table 5** The sample mean and RMSE of the MLE for parameters SN-SFM based on ECM-algorithms and NM algorithm given for sample sizes  $n = 50, 100$  and  $200$ , under Scenario 5 for 1000 simulated data sets.

|                   |       | NM        |           |           |           |            |           | ECM       |       |           |       |           |       |
|-------------------|-------|-----------|-----------|-----------|-----------|------------|-----------|-----------|-------|-----------|-------|-----------|-------|
|                   |       | Initial 1 |           | Initial 2 |           | Initial 3  |           | Initial 1 |       | Initial 2 |       | Initial 3 |       |
|                   |       | True      | Mean      | RMSE      | Mean      | RMSE       | Mean      | RMSE      | Mean  | RMSE      | Mean  | RMSE      | Mean  |
| $n = 50$          | True  |           |           |           |           |            |           |           |       |           |       |           |       |
| $\hat{\beta}$     | 0.5   | 0.428     | 0.258     | 0.422     | 0.270     | 0.417      | 0.256     | 0.426     | 0.257 | 0.426     | 0.258 | 0.416     | 0.248 |
| $\hat{\sigma}_v$  | 1.0   | 0.911     | 0.160     | 0.904     | 0.170     | 0.918      | 0.156     | 0.910     | 0.159 | 0.908     | 0.161 | 0.924     | 0.149 |
| $\hat{\sigma}_u$  | 0.5   | 0.415     | 0.191     | 0.397     | 0.209     | 0.442      | 0.176     | 0.417     | 0.177 | 0.411     | 0.181 | 0.457     | 0.153 |
| $\hat{\lambda}$   | -10.0 | -8601.269 | 24526.916 | -5990.448 | 17265.942 | -22659.560 | 53112.283 | -6.987    | 7.292 | -6.879    | 7.397 | -9.194    | 6.751 |
| $\hat{\lambda}_w$ | -10.0 | -2973.213 | 19904.368 | -5269.966 | 13433.061 | -21729.484 | 49287.254 | -6.767    | 6.924 | -6.665    | 6.739 | -9.079    | 6.395 |
| $\hat{\lambda}_T$ | -10.0 | -4460.271 | 11484.351 | -3142.453 | 8128.122  | -14860.178 | 33759.385 | -6.317    | 6.153 | -6.180    | 6.217 | -8.798    | 5.719 |
| $n = 100$         | True  |           |           |           |           |            |           |           |       |           |       |           |       |
| $\hat{\beta}$     | 0.5   | 0.477     | 0.175     | 0.474     | 0.178     | 0.471      | 0.176     | 0.477     | 0.174 | 0.477     | 0.174 | 0.467     | 0.167 |
| $\hat{\sigma}_v$  | 1.0   | 0.941     | 0.110     | 0.940     | 0.112     | 0.947      | 0.107     | 0.939     | 0.109 | 0.938     | 0.110 | 0.952     | 0.101 |
| $\hat{\sigma}_u$  | 0.5   | 0.424     | 0.163     | 0.423     | 0.167     | 0.443      | 0.150     | 0.421     | 0.155 | 0.419     | 0.158 | 0.455     | 0.131 |
| $\hat{\lambda}$   | -10.0 | -3390.862 | 9974.942  | -3638.435 | 11324.990 | -9326.790  | 26039.591 | -6.243    | 6.064 | -6.225    | 6.093 | -8.457    | 5.682 |
| $\hat{\lambda}_w$ | -10.0 | -2973.815 | 7843.929  | -3194.042 | 8909.673  | -8401.687  | 21231.074 | -6.175    | 5.925 | -6.152    | 5.951 | -8.383    | 5.480 |
| $\hat{\lambda}_T$ | -10.0 | -1712.983 | 4720.394  | -1628.615 | 4543.551  | -5143.284  | 13428.606 | -5.895    | 5.730 | -5.877    | 5.760 | -8.194    | 5.007 |
| $n = 200$         | True  |           |           |           |           |            |           |           |       |           |       |           |       |
| $\hat{\beta}$     | 0.5   | 0.502     | 0.131     | 0.502     | 0.131     | 0.499      | 0.138     | 0.504     | 0.130 | 0.504     | 0.130 | 0.494     | 0.125 |
| $\hat{\sigma}_v$  | 1.0   | 0.960     | 0.084     | 0.960     | 0.084     | 0.963      | 0.081     | 0.957     | 0.084 | 0.957     | 0.084 | 0.966     | 0.076 |
| $\hat{\sigma}_u$  | 0.5   | 0.436     | 0.143     | 0.436     | 0.143     | 0.446      | 0.137     | 0.429     | 0.141 | 0.428     | 0.141 | 0.457     | 0.120 |
| $\hat{\lambda}$   | -10.0 | -1339.100 | 4043.510  | -1451.094 | 4674.754  | -4086.857  | 12170.311 | -6.555    | 5.773 | -6.561    | 5.827 | -8.545    | 5.389 |
| $\hat{\lambda}_w$ | -10.0 | -1204.519 | 3338.669  | -1235.850 | 3409.059  | -3564.778  | 9409.214  | -6.427    | 5.376 | -6.425    | 5.380 | -8.382    | 4.757 |
| $\hat{\lambda}_T$ | -10.0 | -625.787  | 1749.751  | -650.695  | 1831.476  | -2066.752  | 5775.747  | -6.225    | 5.159 | -6.215    | 5.156 | -8.307    | 4.342 |

**Table 6** The sample mean and RMSE of the MLE for parameters SN-SFM based on ECM-algorithms and NM algorithm given for sample sizes  $n = 50, 100$  and  $200$ , under Scenario 6 for 1000 simulated data sets.

|          | NM                |           |           |           |           |           |           |           |           |           |           |           | ECM       |       |  |
|----------|-------------------|-----------|-----------|-----------|-----------|-----------|-----------|-----------|-----------|-----------|-----------|-----------|-----------|-------|--|
|          | True              | Initial 1 |           | Initial 2 |           | Initial 3 |           | Initial 1 |           | Initial 2 |           | Initial 3 |           |       |  |
|          |                   | Mean      | RMSE      | Mean      | RMSE      | Mean      | RMSE      | Mean      | RMSE      | Mean      | RMSE      | Mean      | RMSE      |       |  |
| $n = 50$ | $\hat{\beta}$     | 1.0       | 0.944     | 0.248     | 0.937     | 0.253     | 0.937     | 0.252     | 0.921     | 0.250     | 0.920     | 0.251     | 0.940     | 0.247 |  |
|          | $\hat{\sigma}_v$  | 1.0       | 0.630     | 0.438     | 0.581     | 0.474     | 0.700     | 0.400     | 0.499     | 0.536     | 0.506     | 0.528     | 0.869     | 0.254 |  |
|          | $\hat{\sigma}_u$  | 0.5       | 0.841     | 0.434     | 0.893     | 0.451     | 0.766     | 0.391     | 0.964     | 0.502     | 0.958     | 0.495     | 0.591     | 0.269 |  |
|          | $\hat{\lambda}$   | -10.0     | -807.511  | 1449.260  | -757.650  | 1394.262  | -895.028  | 1636.819  | -6.670    | 9.500     | -6.103    | 6.979     | -9.877    | 9.398 |  |
|          | $\hat{\lambda}_w$ | -10.0     | -784.386  | 1367.575  | -732.876  | 1307.826  | -869.291  | 1548.397  | -6.271    | 6.725     | -5.992    | 6.720     | -9.574    | 7.920 |  |
|          | $\hat{\lambda}_T$ | -10.0     | -658.231  | 1122.281  | -607.542  | 1063.042  | -722.832  | 1265.452  | -5.886    | 6.340     | -5.625    | 6.401     | -8.768    | 6.138 |  |
|          | $n = 100$         |           | NM        |           |           |           |           |           | ECM       |           |           |           |           |       |  |
|          |                   | True      | Initial 1 |           | Initial 2 |           | Initial 3 |           | Initial 1 |           | Initial 2 |           | Initial 3 |       |  |
|          |                   |           | Mean      | RMSE      | Mean      | RMSE      | Mean      | RMSE      | Mean      | RMSE      | Mean      | RMSE      | Mean      | RMSE  |  |
|          | $\hat{\beta}$     | 1.0       | 0.974     | 0.180     | 0.972     | 0.180     | 0.972     | 0.181     | 0.958     | 0.176     | 0.959     | 0.177     | 0.971     | 0.177 |  |
|          | $\hat{\sigma}_v$  | 1.0       | 0.607     | 0.453     | 0.575     | 0.473     | 0.697     | 0.402     | 0.507     | 0.525     | 0.512     | 0.519     | 0.885     | 0.252 |  |
|          | $\hat{\sigma}_u$  | 0.5       | 0.888     | 0.456     | 0.923     | 0.468     | 0.794     | 0.408     | 0.981     | 0.509     | 0.978     | 0.505     | 0.600     | 0.272 |  |
|          | $\hat{\lambda}$   | -10.0     | -581.222  | 1240.422  | -573.587  | 1253.052  | -671.273  | 1490.272  | -5.455    | 12.356    | -4.953    | 6.832     | -8.914    | 9.705 |  |
|          | $\hat{\lambda}_w$ | -10.0     | -551.028  | 1104.009  | -541.470  | 1117.422  | -633.888  | 1336.367  | -4.990    | 6.612     | -4.825    | 6.603     | -8.569    | 7.638 |  |
|          | $\hat{\lambda}_T$ | -10.0     | -432.123  | 878.845   | -410.406  | 854.241   | -465.962  | 980.535   | -4.631    | 6.466     | -4.483    | 6.486     | -7.648    | 5.706 |  |
|          | $n = 200$         |           | NM        |           |           |           |           |           | ECM       |           |           |           |           |       |  |
|          |                   | True      | Initial 1 |           | Initial 2 |           | Initial 3 |           | Initial 1 |           | Initial 2 |           | Initial 3 |       |  |
|          |                   |           | Mean      | RMSE      | Mean      | RMSE      | Mean      | RMSE      | Mean      | RMSE      | Mean      | RMSE      | Mean      | RMSE  |  |
|          | $\hat{\beta}$     | 1.0       | 0.986     | 0.131     | 0.986     | 0.131     | 0.986     | 0.131     | 0.977     | 0.127     | 0.977     | 0.128     | 0.985     | 0.128 |  |
|          | $\hat{\sigma}_v$  | 1.0       | 0.604     | 0.441     | 0.574     | 0.459     | 0.727     | 0.368     | 0.534     | 0.488     | 0.534     | 0.488     | 0.875     | 0.248 |  |
|          | $\hat{\sigma}_u$  | 0.5       | 0.902     | 0.448     | 0.935     | 0.461     | 0.774     | 0.379     | 0.969     | 0.486     | 0.969     | 0.485     | 0.619     | 0.265 |  |
|          | $\hat{\lambda}$   | -10.0     | -234.826  | 752.702   | -246.996  | 789.136   | -294.477  | 943.125   | -3.920    | 6.983     | -3.897    | 6.959     | -6.374    | 6.221 |  |
|          | $\hat{\lambda}_w$ | -10.0     | -211.294  | 638.747   | -226.343  | 683.618   | -269.227  | 814.364   | -3.845    | 6.876     | -3.832    | 6.876     | -6.194    | 5.634 |  |
|          | $\hat{\lambda}_T$ | -10.0     | -99.159   | 348.801   | -108.575  | 386.531   | -126.444  | 440.133   | -3.483    | 6.893     | -3.479    | 6.898     | -5.725    | 5.171 |  |
